# Supplementary material for: Synthesis of size-controlled silver nanodecahedrons and their application for core–shell surface enhanced Raman scattering (SERS) tags
Source: Royal Society of Chemistry journal article supplement (doi:10.1039/c2ra22132b), 2012-11-06
Supplement: c2ra22132b.pdf [file c2ra22132b.pdf]

## Electronic Supplementary Information

to

# Synthesis of size-controlled silver nanodecahedrons and their application for core-shell surface enhanced Raman scattering (SERS) tags

Haifei Lu,<sup>a,b</sup> Zhiwen Kang,<sup>a</sup> Haixi Zhang,<sup>a,b</sup> Zhili Xie,<sup>c</sup> Guanghui Wang,<sup>a,c</sup> Xia Yu,<sup>b</sup> Huiyu Zhang,<sup>b</sup> Ken-Tye Yong,<sup>c</sup> Ping Shum,<sup>c</sup> and Ho-Pui Ho\*<sup>a</sup>

<sup>a</sup> Department of Electronic and Engineering, the Chinese University of Hong Kong, Shatin, Hong Kong SAR, P. R. China. E-mail: hpho@ee.cuhk.edu.hk

<sup>b</sup> Singapore Institute of Manufacturing Technology, 71 Nanyang Drive, 638075, Singapore.

<sup>c</sup> School of Electrical and Electronic Engineering, Nanyang Technological University, 50 Nanyang Avenue, 639798, Singapore.

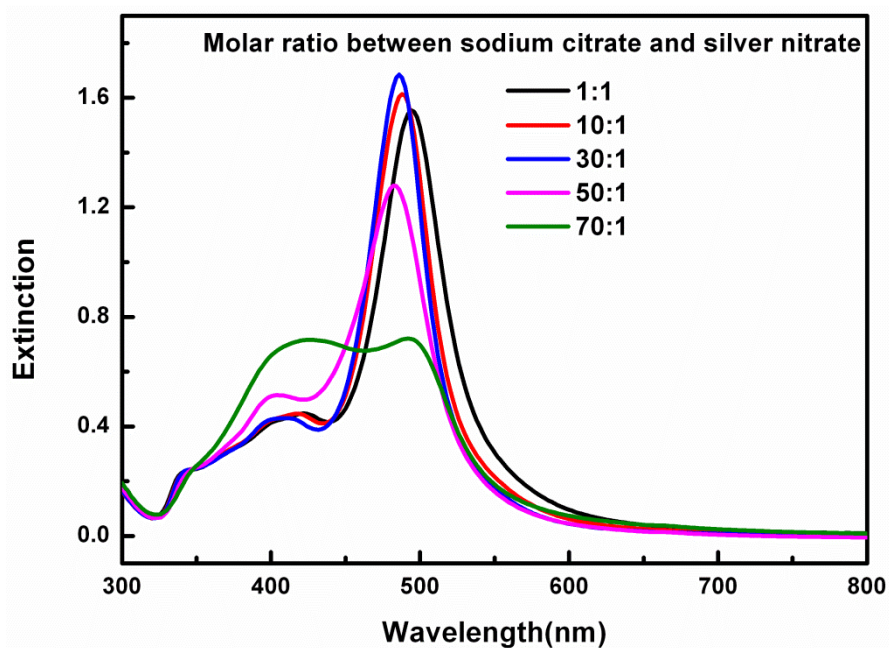

Figure S1. UV-vis spectra of silver colloids after 465 nm light irradiation on solutions prepared from different sodium citrate/silver nitrate ratios.

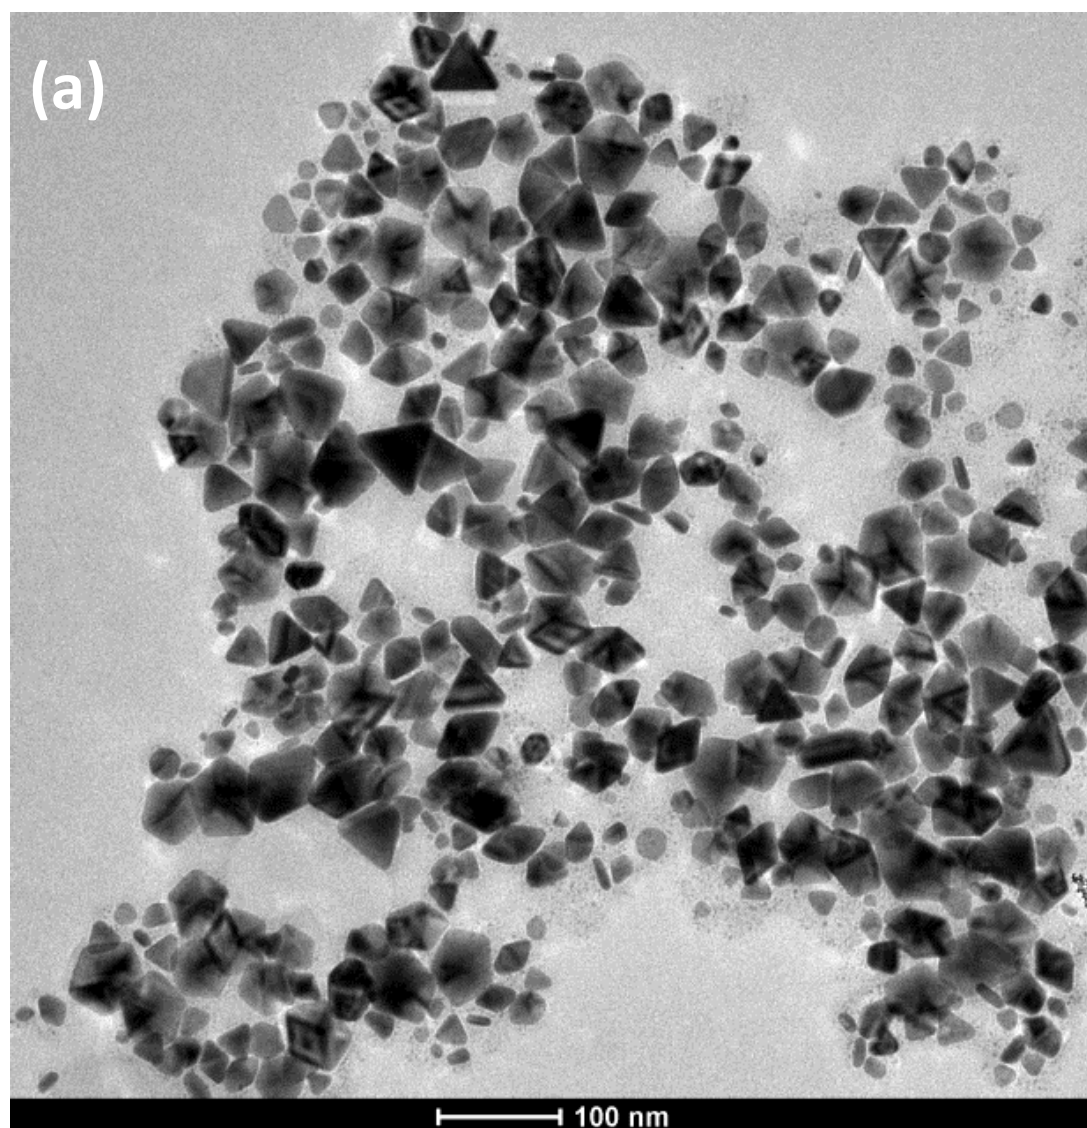

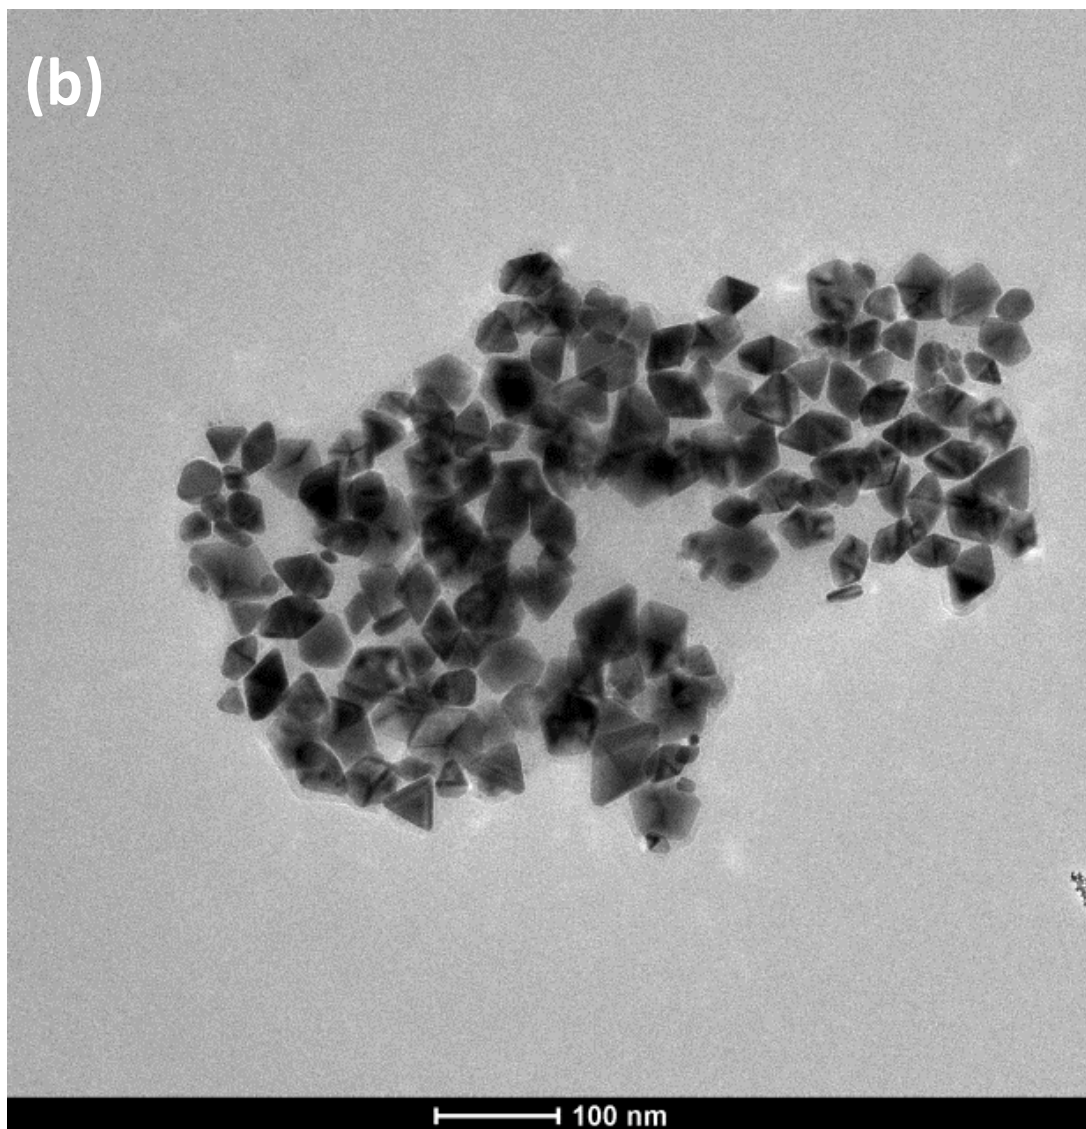

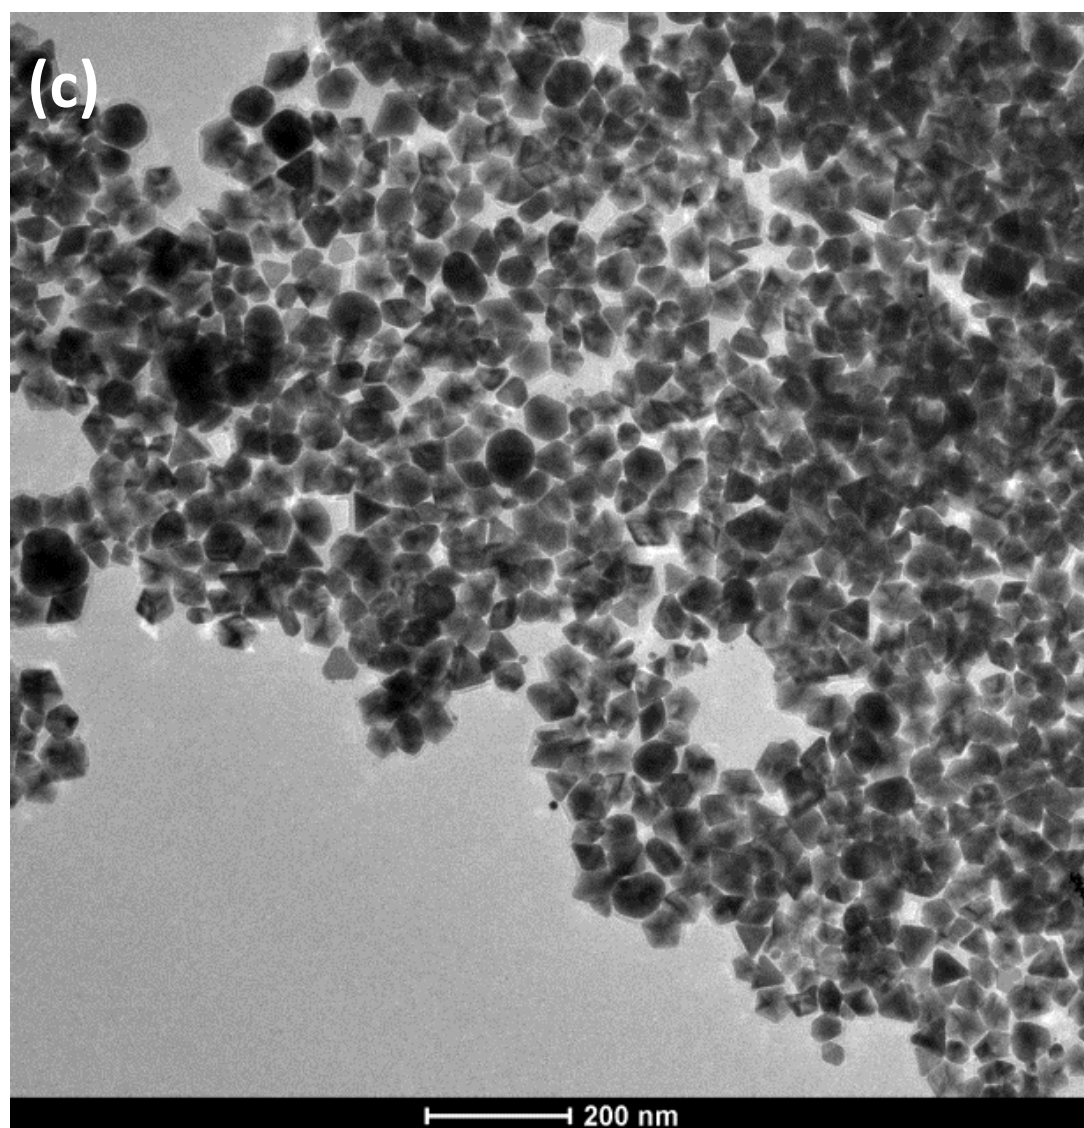



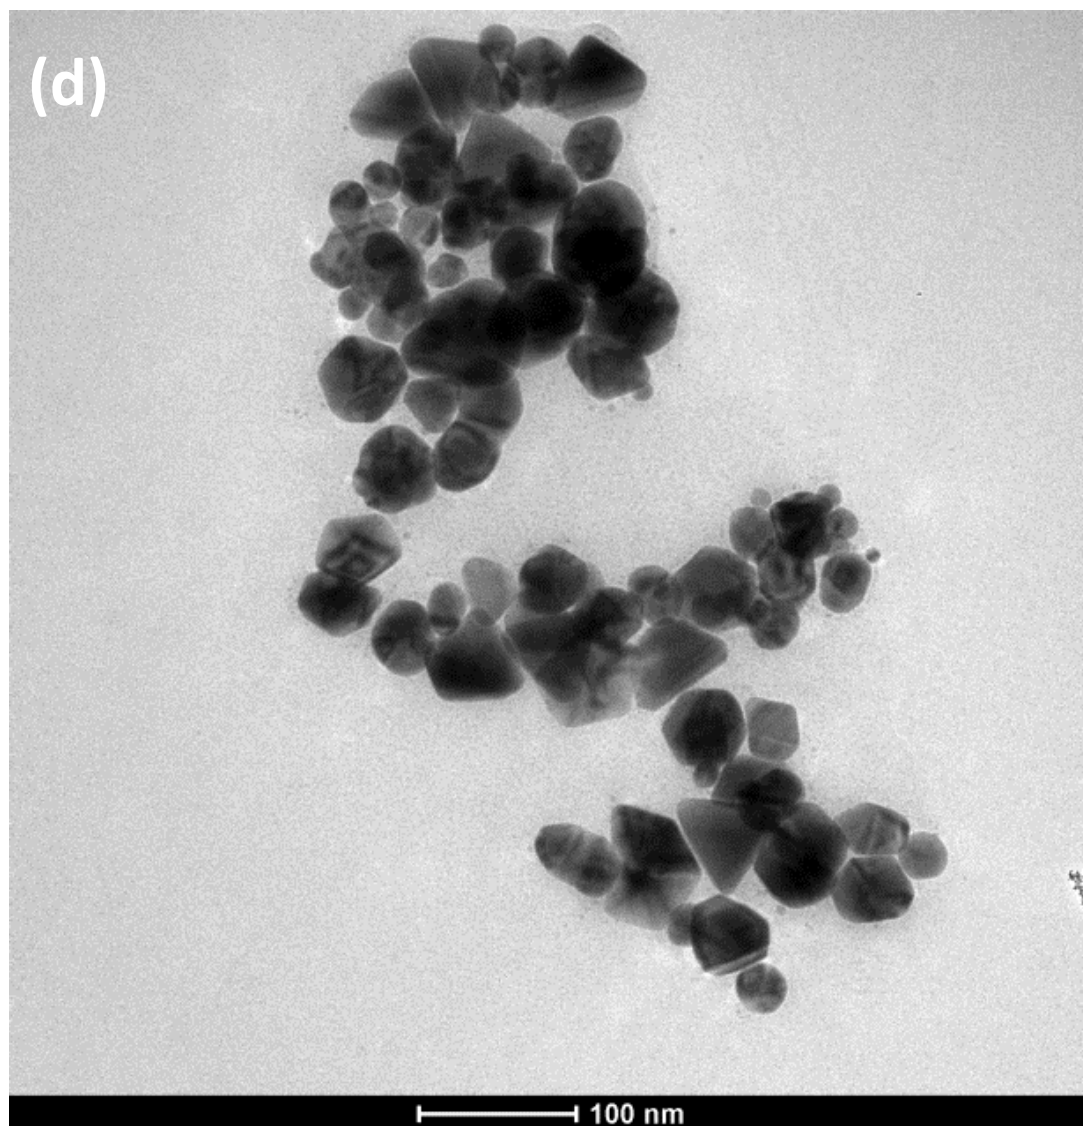

Figure S2. TEM images of silver nanoparticles prepared from sodium citrate/silver nitrate ratio at (a) 10:1, (b) 30:1, (c) 50:1 and (d) 70:1 after 465 nm light irradiation.

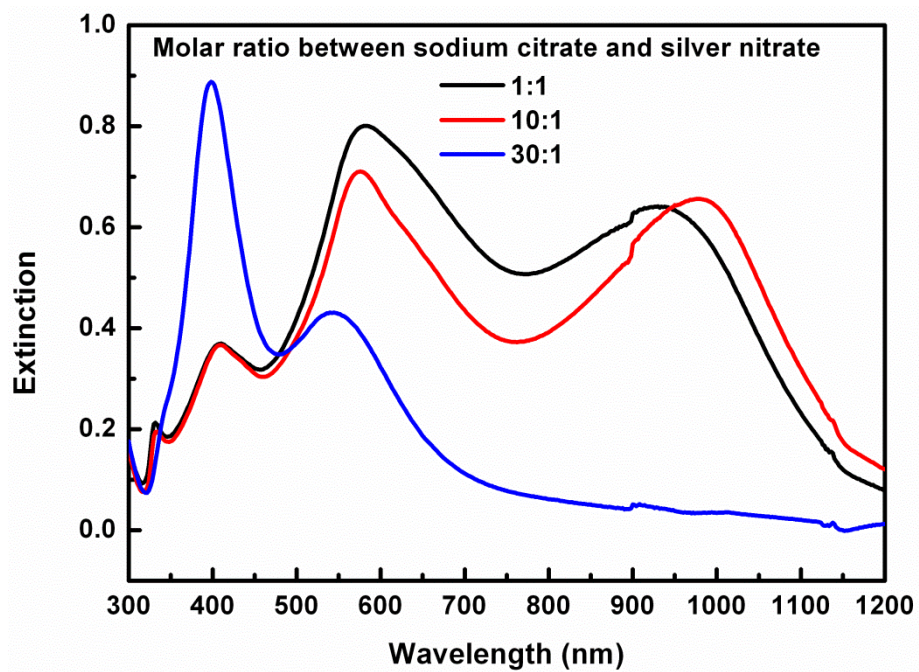

Figure S3. UV-vis spectra of silver colloids after 520 nm light irradiation on solutions prepared from different sodium citrate/silver nitrate ratios.

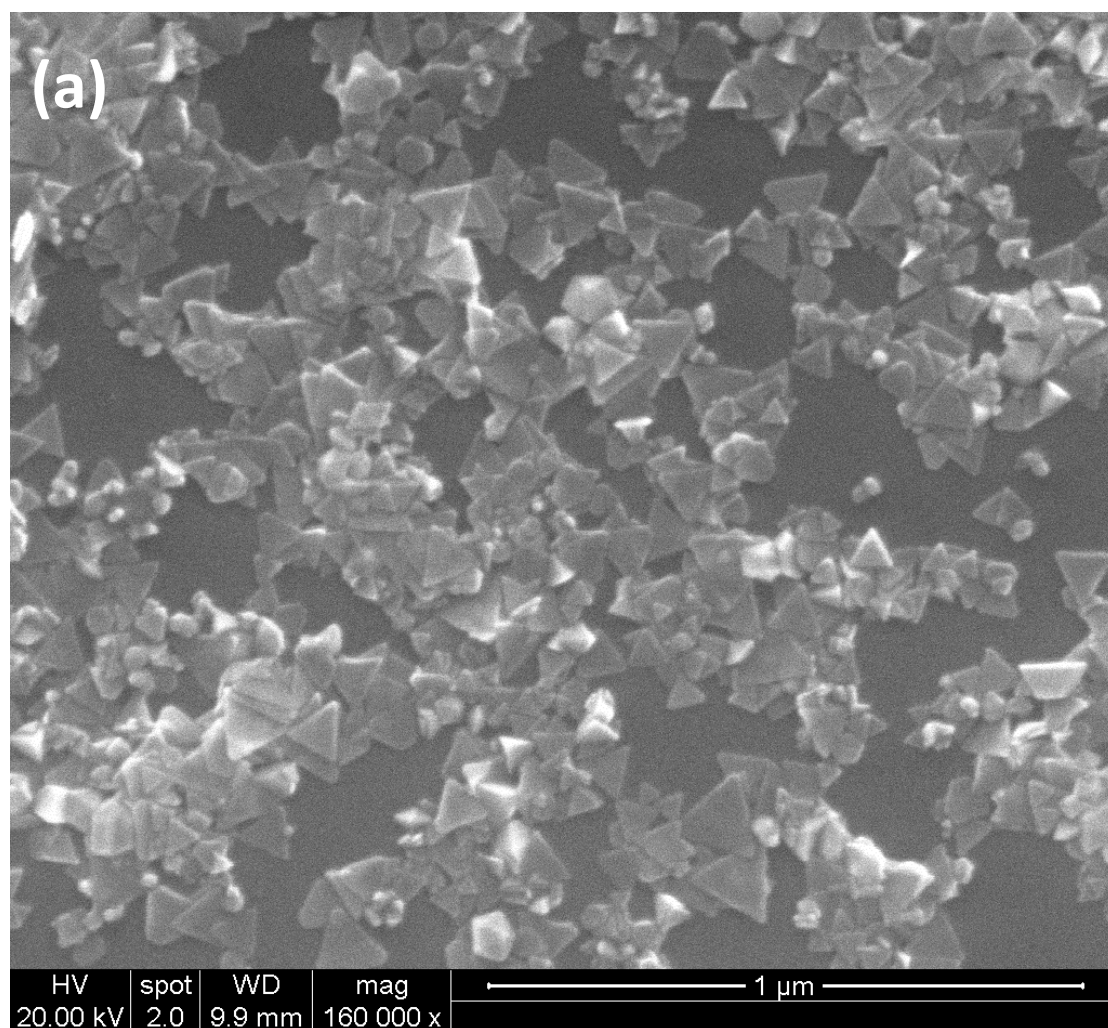



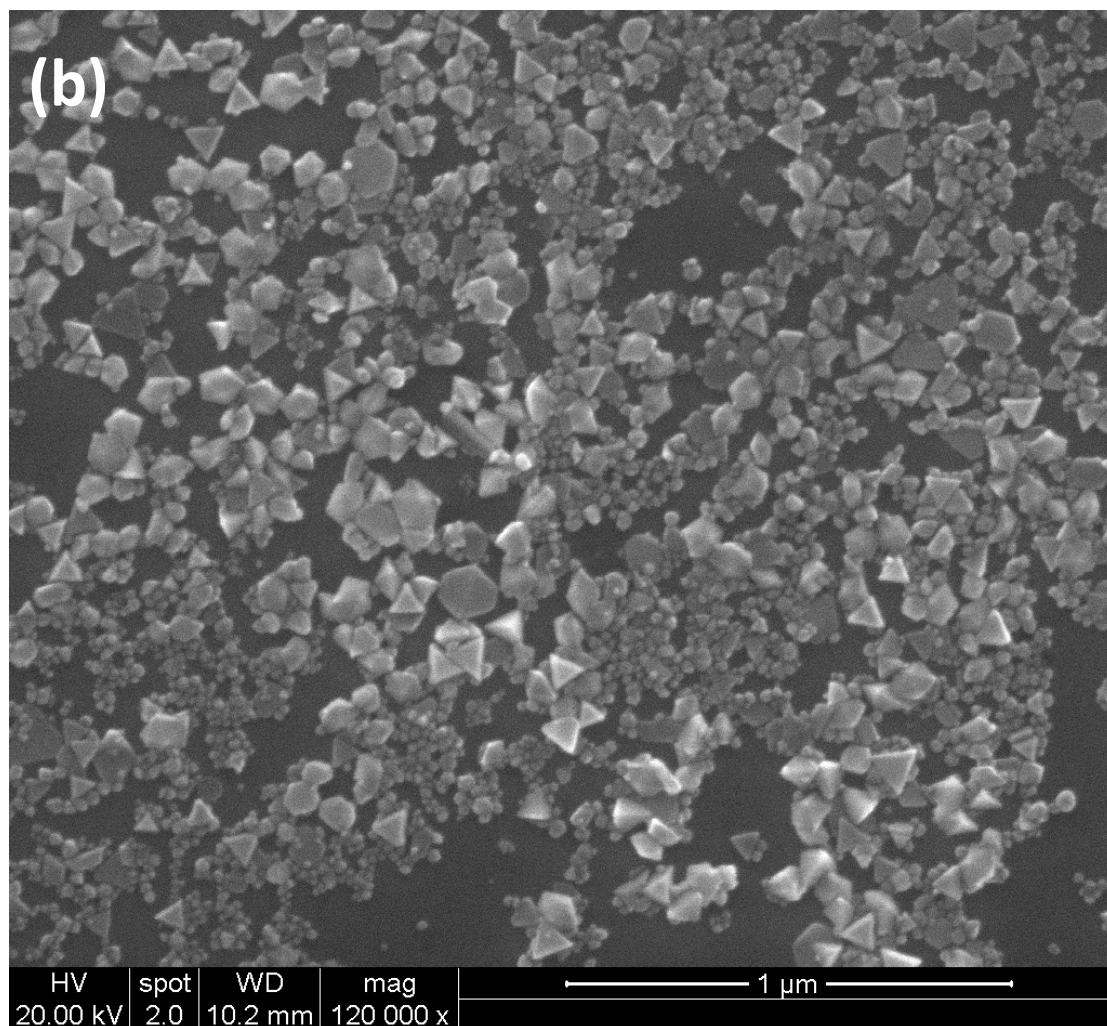

Figure S4. SEM images of silver nanoparticles prepared from sodium citrate/silver nitrate ratio at (a) 10:1 and (b) 30:1 after 520 nm light irradiation.
